# Supplementary material for: Lens Aquaporin-5 Inserts Into Bovine Fiber Cell Plasma Membranes Via Unconventional Protein Secretion
Source: PubMed Central journal article supplement — Invest Ophthalmol Vis Sci. 2022 Jul 11;63(8):5. doi: 10.1167/iovs.63.8.5 (PMC9284464; doi:10.1167/iovs.63.8.5), 2022-07-11
Supplement: iovs-63-8-5_s001.pdf [file iovs-63-8-5_s001.pdf]

## Lens aquaporin-5 inserts into bovine fiber cell plasma membranes via unconventional protein secretion

Romell B. Gletten<sup>1</sup>, Lee S. Cantrell<sup>1</sup>, Sujoy Bhattacharya<sup>2</sup>, and Kevin L. Schey<sup>1</sup>

<sup>1</sup>Department of Biochemistry, Vanderbilt University, Nashville, Tennessee, United States

<sup>2</sup>Department of Ophthalmology and Visual Sciences

Correspondence: Kevin L. Schey, Mass Spectrometry Research Center, 465 21st Avenue South, Suite 9160, Medical Research Building III, Vanderbilt University, Nashville, TN 37232-8575, USA  
[kevin.schey@vanderbilt.edu](mailto:kevin.schey@vanderbilt.edu)

# SUPPLEMENTARY DATA

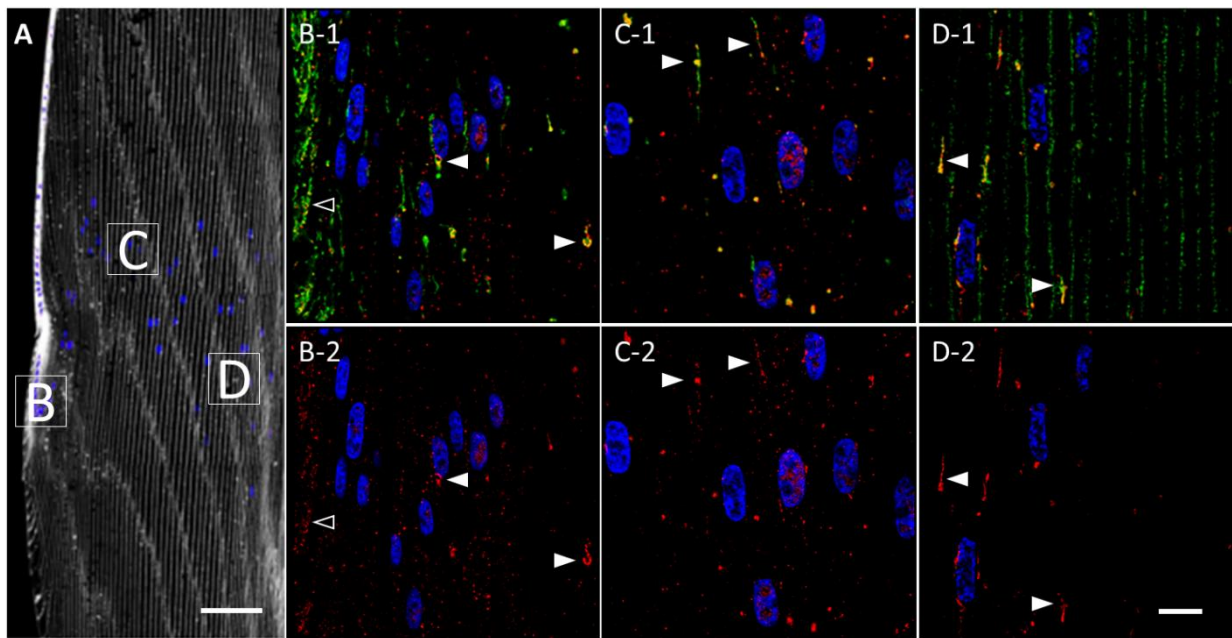

**S1. Cytochrome c oxidase subunit IV (COX IV) and AQP5 are *co-expressed* molecular markers for the same cluster of cytoplasmic vesicles in the bovine lens cortex.**

**A.** A low-magnification representative image of the bovine lens bow region with plasma membranes (**white**) and cellular nuclei (**blue**) labeled by WGA and DAPI, respectively. The *peripheral outer cortex* (i.e. includes *lens modiolus*), *medial outer cortex*, and *outer cortex-inner cortex transitional region* are demarcated by **B**, **C**, and **D**, respectively, and correspond spatially with the images in **B-D**.

**B-1 – D-1.** High-magnification confocal images of AQP5 immunolabeling (**green**) and *cytochrome c oxidase subunit IV* (COX IV) immunolabeling (**red**) in the *peripheral outer cortex* (**A**), *medial outer cortex*

(B), and outer cortex-inner cortex transitional region (C) of the bovine lens as demarcated in **Figure S1A**.

Tubular (A, open arrowheads) and spheroidal, tubular (B and C; closed arrowheads) AQP5-containing cytoplasmic vesicles and COX IV-containing mitochondria colocalize in the outer cortex of bovine lenses.

**B-2 – D-2.**

Replicate images of **A-1**, **B-1**, and **C-1** with COX IV immunolabeling and DAPI labeling only displayed.

Scale bars represent 100  $\mu\text{m}$  (A) and 10  $\mu\text{m}$  (B, C, and D).

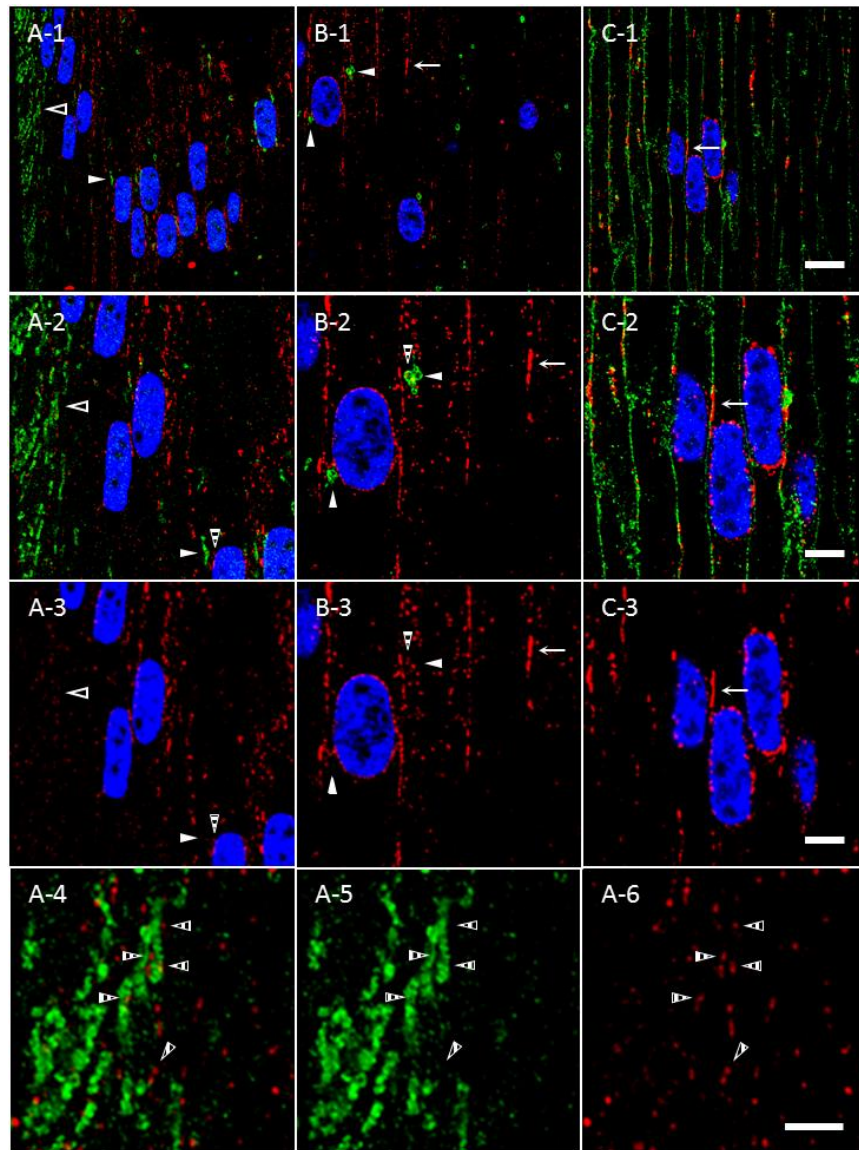

**S2. AQP5-containing cytoplasmic vesicles and calnexin-containing endoplasmic reticula fail to overlap in the bovine lens cortex.**

**A-1 – C-1.**

High-magnification confocal images of AQP5 immunolabeling (**green**) and calnexin labeling (**red**) in the *peripheral outer cortex* (A-1), *medial outer cortex* (B-1), and *outer cortex-inner cortex transitional region* (C-1) of the bovine lens (demarcated in **Figure 3A**). Calnexin is an integral membrane protein in the endoplasmic reticulum (ER). In the *peripheral outer cortex* and *medial outer cortex*, calnexin is cytoplasmically expressed in irregular, punctate vesicles or tubular, plaque-

like ER compartments apposed to fiber cell plasma membranes. Calnexin is also expressed in the perinuclear ER (**B-1**, **B-2**, **C-1**, and **C-2**). By the outer cortex-inner cortex transitional region, calnexin expression is primarily localized to the perinuclear ER and tubular ER apposed to fiber cell plasma membranes (**B** and **C**, arrows).

AQP5-containing cytoplasmic vesicles lack significant calnexin expression. However, calnexin-containing ER form multiple appositions (**A-3**, **A-4**, **A-5**, **A-6**, **B-3**, and **B-4**, *striped arrowheads*) with tubular (**A**, *open arrowheads*) and spheroidal, tubular (**A** and **B**; *closed arrowheads*) AQP5-containing cytoplasmic vesicles.

**A-2 – C-2.** Enlarged images of the AQP5-containing cytoplasmic vesicles demarcated by the *arrowheads* in **A-1** and **B-1** and of the calnexin-containing tubular ER compartment demarcated by the *arrows* in **B-1** and **C-1**.

**A-3 – C-3.** Replicate images of **A-2**, **B-2**, and **C-2** with calnexin immunolabeling and DAPI labeling only displayed.

**A-4.** Enlarged image of tubular AQP5-containing cytoplasmic vesicles demarcated by the *open arrowhead* in **A-2**. These vesicles typically form several appositions with calnexin-containing ER (*striped arrowheads*)

**A-5.** A replicate image of **A-4** with AQP5 immunolabeling only displayed.

**A-6.** A replicate image of **A-4** with calnexin immunolabeling only displayed.

Scale bars represent 10  $\mu\text{m}$  (**A-1**, **B-1**, and **C-1**), 5  $\mu\text{m}$  (**A-2**, **A-3**, **B-2**, **B-3**, **C-2**, and **C-3**), and 2.5  $\mu\text{m}$  (**A-4**, **A-5**, and **A-6**).

**A.**

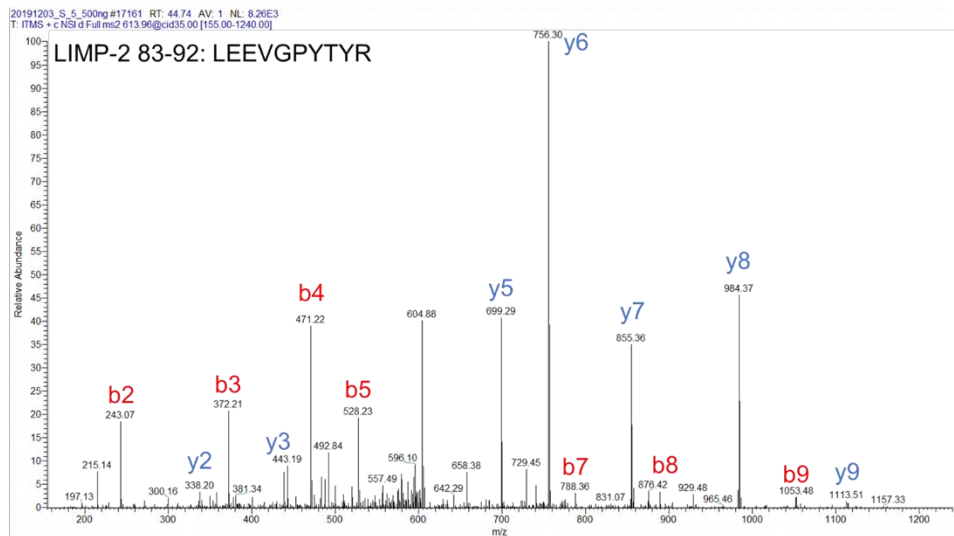

**B.**

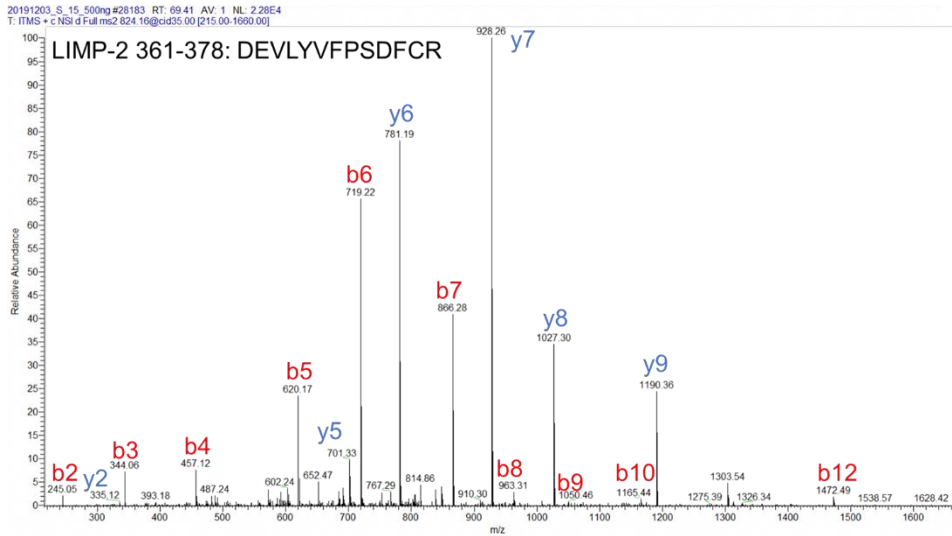

**S3. Tandem mass spectra identifying LIMP-2 in bovine lens cortical fiber cells.**

- A.** High mass resolution CID spectrum of doubly-charged LIMP-2 peptide 82-93, m/z 824.16, acquired on a Thermo Fisher Velos Pro linear ion trap. The observed mass corresponds to one carbamidomethylated cysteine residue on the peptide (b12, y2). The peptide amino acid sequence is included above.
- B.** High mass resolution CID spectrum of doubly-charged LIMP-2 peptide 361-378, m/z 824.16, acquired on a Thermo Fisher Velos Pro linear ion trap. The observed mass corresponds to one carbamidomethylated cysteine residue on the peptide (b12, y2). The peptide amino acid sequence is included above.

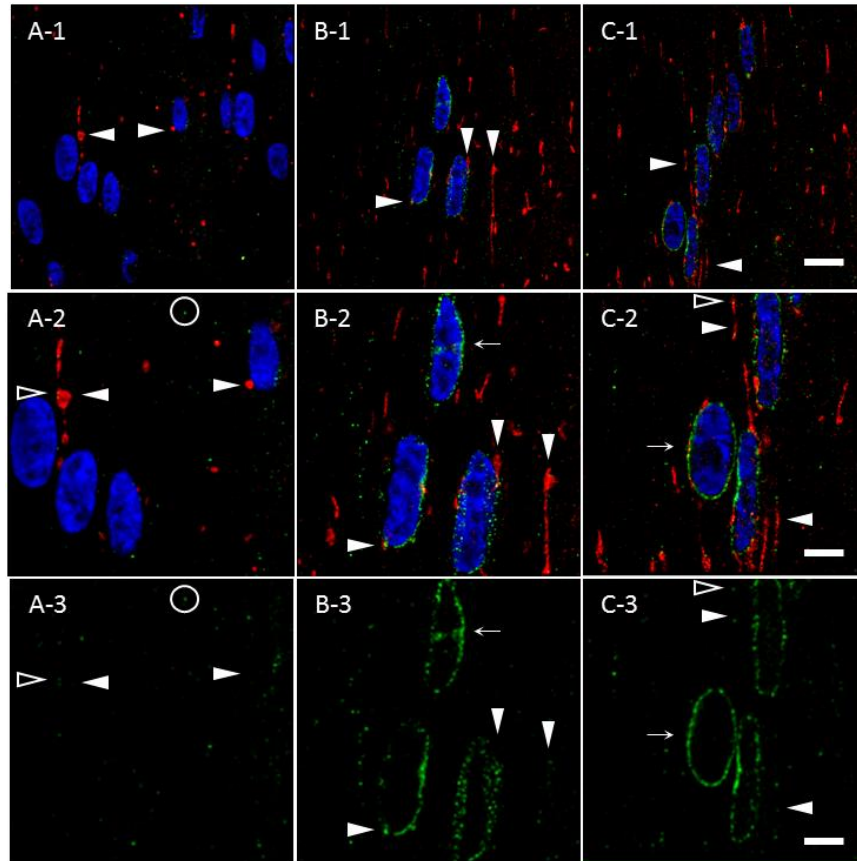

**S4. TOMM20-containing cytoplasmic vesicles lack significant Sec22 $\beta$  expression in bovine lens cortical fiber cells.**

**A-1 – C-1.** High-magnification images of Sec22 $\beta$  immunolabeling (**green**) and TOMM20 immunolabeling (**red**) in the *peripheral outer cortex* (**A**), *medial outer cortex* (**B**), and *outer cortex-inner cortex transitional region* (**C**) as demarcated in **Figure 3A**.

TOMM20-containing cytoplasmic vesicles (**closed arrowheads**) are expressed throughout the outer cortex. Initial Sec22 $\beta$  expression in the *peripheral outer cortex* (**A**) is weak but strengthens within the *medial outer cortex* (**B**) and remains consistent within the rest of the outer cortex in **C**. Throughout the outer cortex, Sec22 $\beta$  is initially expressed within diffuse, punctate cytoplasmic vesicles (**A**, *hollow circle*) that tangibly but insignificantly colocalize with TOMM20-containing cytoplasmic vesicles (**A-2**, **A-3**, **C-2**, and **C-3**; *open arrowheads*). Excluding the lens modiolus, Sec22 $\beta$  is also ubiquitously expressed within the cellular nucleus-contiguous rough endoplasmic reticulum (**B-2**, **B-3**, **C-2**, and **C-3**; *closed arrows*).

**A-2 – C-2.** Enlarged images of the TOMM20-containing cytoplasmic vesicles demarcated by arrowheads in **A-1**, **B-2**, and **C-1**.

**A-3 – C-3.** Replicate images of **A-2 – C-2** depicting Sec22 $\beta$  immunolabeling and DAPI labeling only.

Scale bars denote 10  $\mu\text{m}$  (**A-1 – C-1**) and 5  $\mu\text{m}$  (**A-2 – C-2** and **A-3 – C-3**).
